# Supplementary material for: Facile fabrication of highly controllable gating systems based on the combination of inverse opal structure and dynamic covalent chemistry
Source: Royal Society of Chemistry journal article supplement (doi:10.1039/c7nr00881c), 2017-01-01
Supplement: c7nr00881c1.pdf [file c7nr00881c1.pdf]

## **Facile fabrication of highly controllable gating systems based on the combination of inverse opal structure and dynamic covalent chemistry**

*Chen Wang,<sup>‡,a</sup> Haowei Yang,<sup>‡a,b</sup> Li Tian,<sup>a</sup> Shiqiang Wang,<sup>a</sup> Ning Gao,<sup>a</sup> Wanlin Zhang,<sup>a</sup> Peng Wang,<sup>a</sup> Xianpeng Yin,<sup>a</sup> and Guangtao Li<sup>\*,a</sup>*

<sup>a</sup> Key Lab of Organic Optoelectronics and Molecular Engineering, Department of Chemistry, Tsinghua University, Beijing, 100084, P. R. China

E-mail: [lgt@mail.tsinghua.edu.cn](mailto:lgt@mail.tsinghua.edu.cn)

<sup>b</sup> Department of Economic Operation, China National Tobacco Corporation, No. 55 South Yuetan Boulevard Xicheng District, Beijing 100045, P. R. China

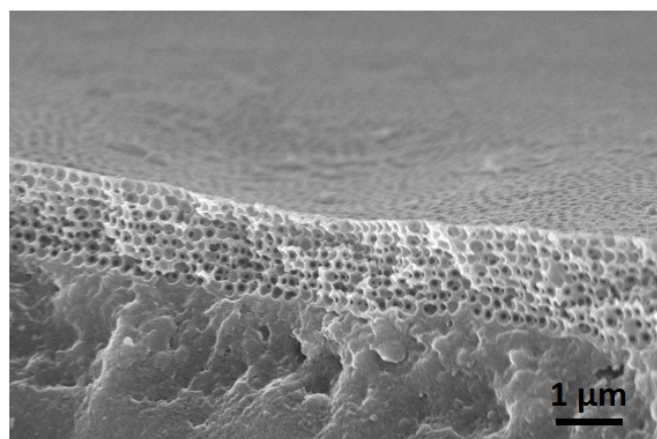

**Figure S1.** The cross-section SEM image of the inverse opal film.

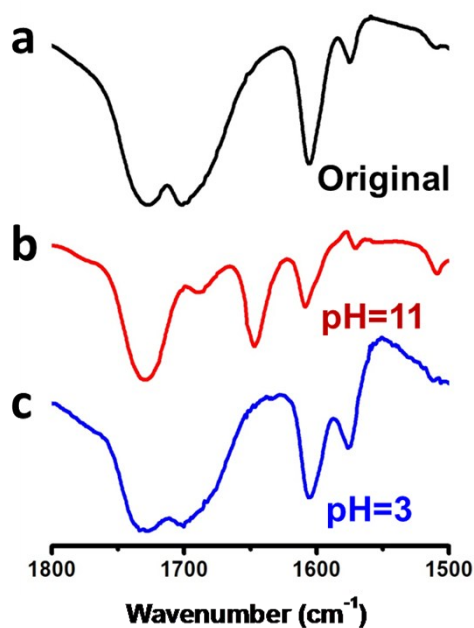

**Figure S2.** The FTIR data of (a) blank benzaldehyde-containing film and corresponding films reacted with alkyl amines at (b) pH = 11 and (c) pH = 3.

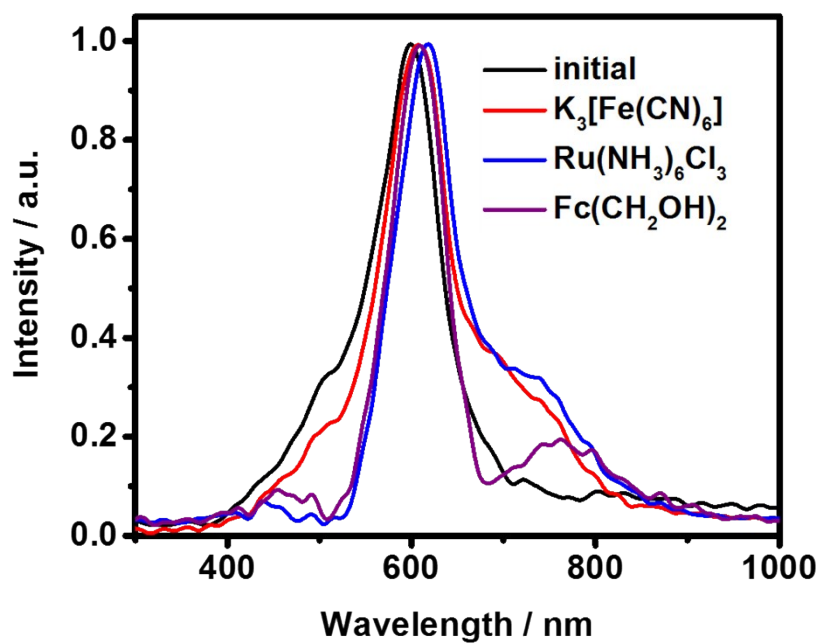

**Figure S3.** Optical response of the negative charge controlled system upon transport of three redox probes  $\text{Ru}(\text{NH}_3)_6\text{Cl}_3$ ,  $\text{K}_3[\text{Fe}(\text{CN})_6]$  and  $\text{Fc}(\text{CH}_2\text{OH})_2$ , respectively.
